# Supplementary material for: Molecular botanical garden: assembly of supramolecular silver(I) and mercury(II) complexes of NS2-donor macrocycles with flower-, leaf- and tree-shaped structures
Source: Royal Society of Chemistry journal article supplement (doi:10.1039/b814051k), 2008-10-17
Supplement: b814051k.pdf [file b814051k.pdf]

## **Electronic Supplementary Information**

**for**

**Molecular botanical garden: assembly of supramolecular silver(I) and mercury(II) complexes of NS<sub>2</sub>-donor macrocycles with flower-, leaf- and tree-shaped structures**

**Sunhong Park, So Young Lee, Minhye Jo, Jai Young Lee and Shim Sung Lee\***

*Department of Chemistry (BK21) and Research Institute of Natural Science, Gyeongsang National University, Jinju 660-701, S. Korea. E-mail: sslee@gnu.ac.kr*

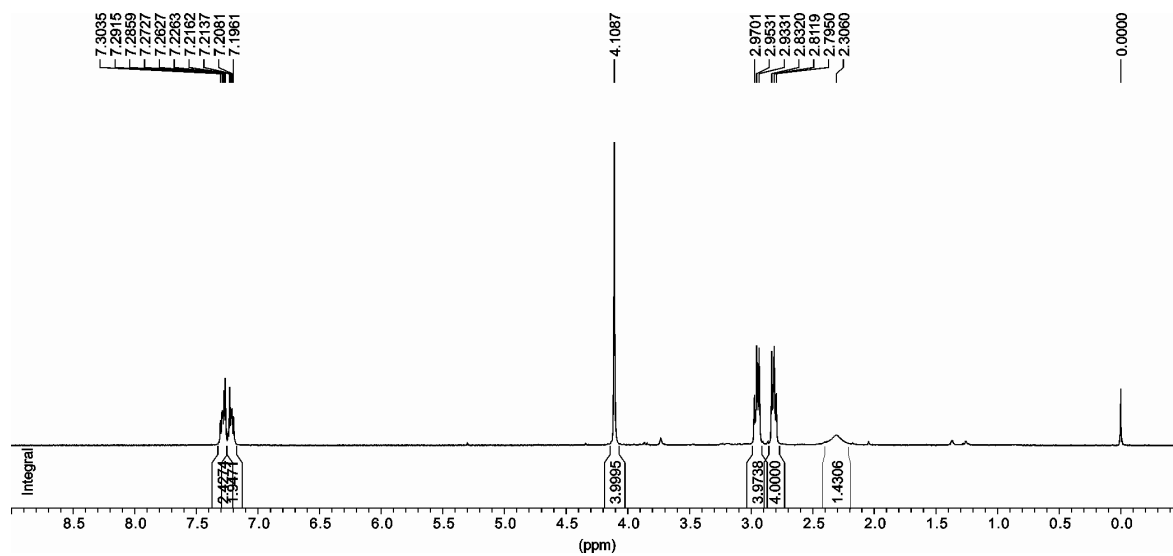

Fig. S1  $^1\text{H}$  NMR spectrum of  $\text{L}^1$  in  $\text{CDCl}_3$ .

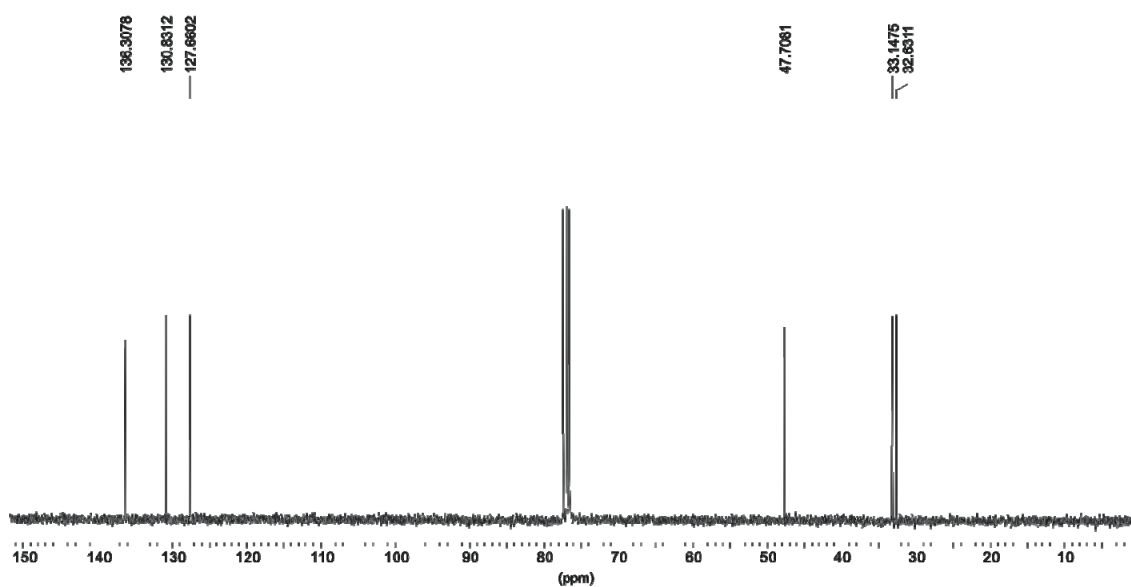

Fig. S2  $^{13}\text{C}$  NMR spectrum of  $\text{L}^1$  in  $\text{CDCl}_3$ .

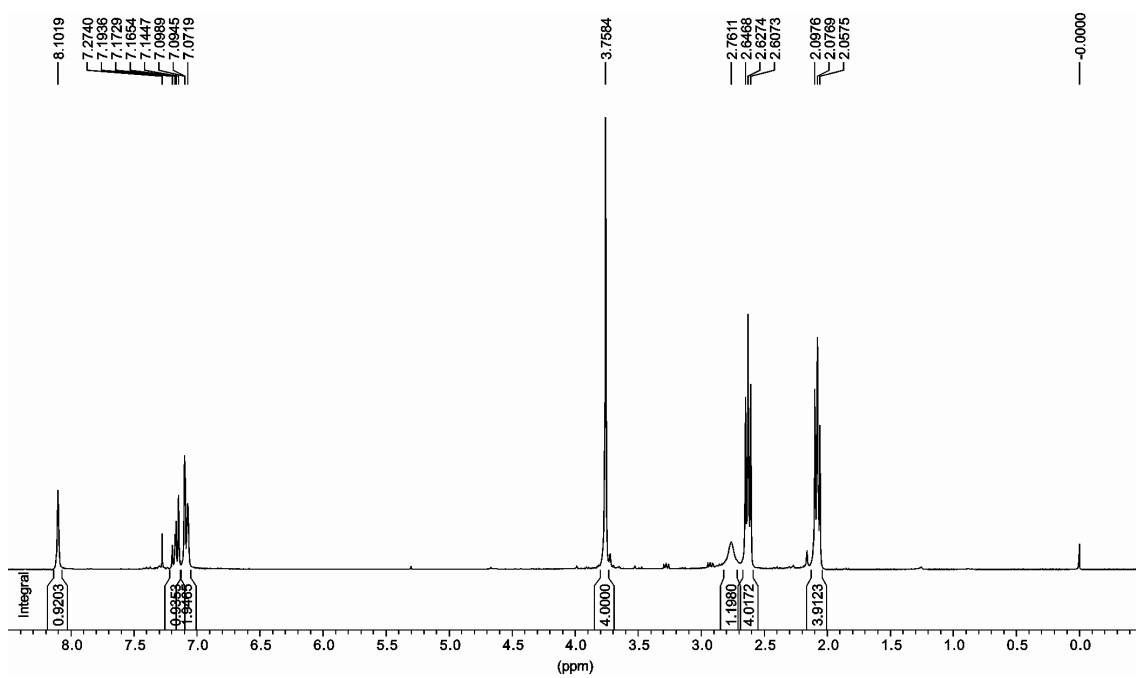

Fig. S3  $^1\text{H}$  NMR spectrum of  $\text{L}^2$  in  $\text{CDCl}_3$ .

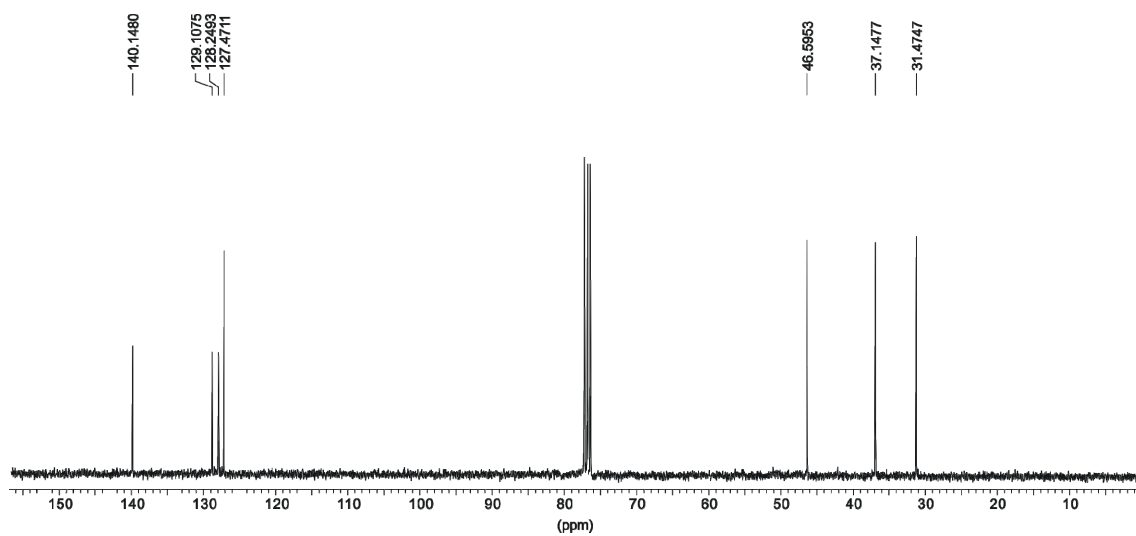

Fig. S4  $^{13}\text{C}$  NMR spectrum of  $\text{L}^2$  in  $\text{CDCl}_3$ .

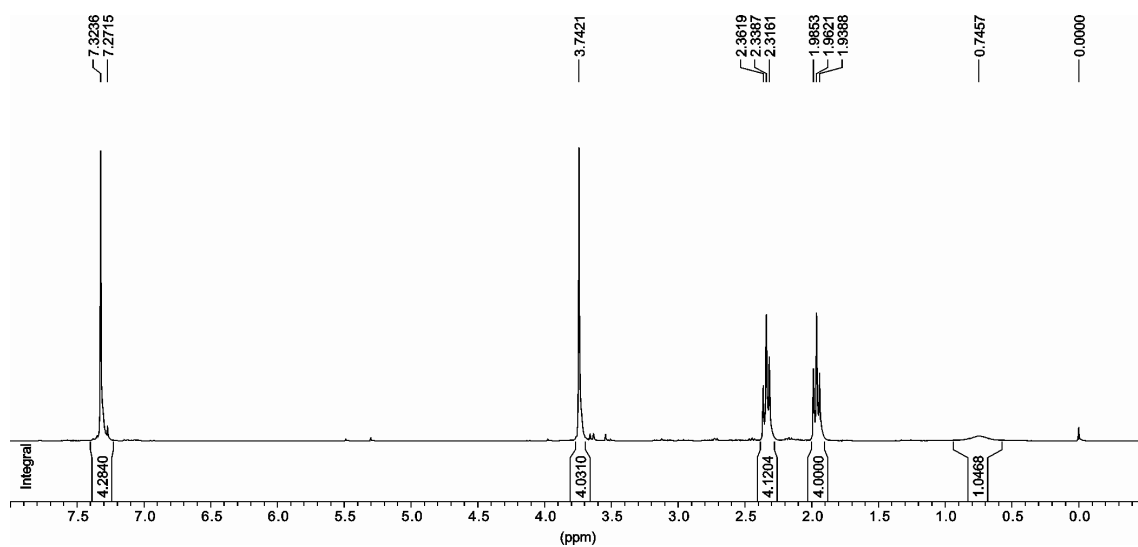

Fig. S5 <sup>1</sup>H NMR spectrum of L<sup>3</sup> in CDCl<sub>3</sub>.

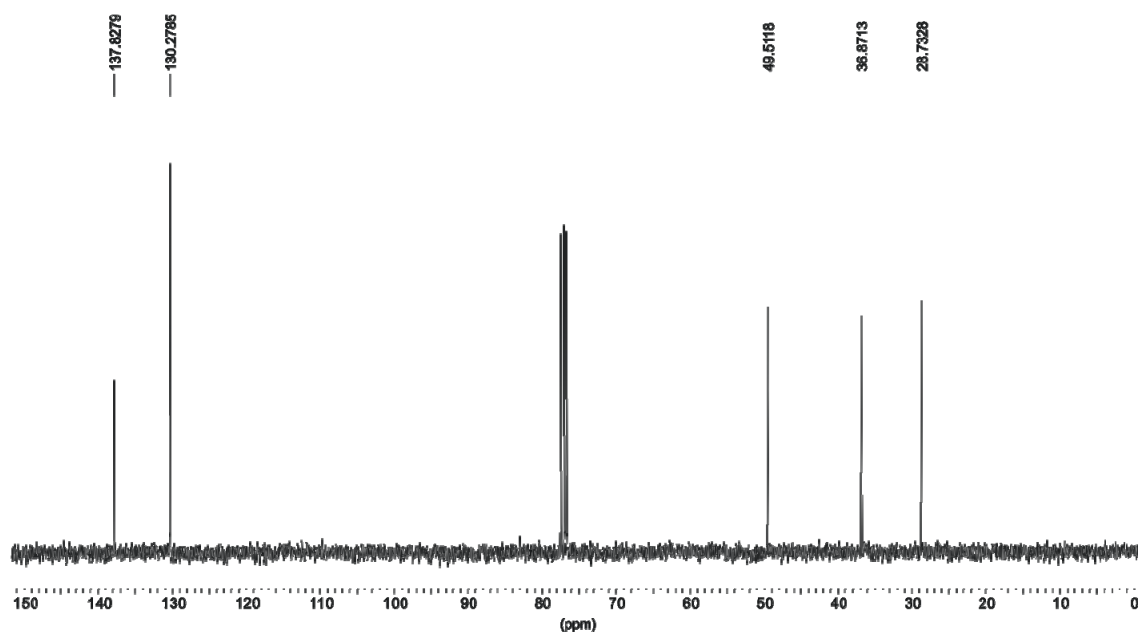

Fig. S6 <sup>13</sup>C NMR spectrum of L<sup>3</sup> in CDCl<sub>3</sub>.

[Ag<sub>6</sub>(L<sup>1</sup>)<sub>6</sub>(PF<sub>6</sub>)](PF<sub>6</sub>)<sub>5</sub> (**1**). Layering a methanol (3 mL) of AgPF<sub>6</sub> (15.9 mg, 0.06 mmol) onto a dichloromethane solution (2 mL) of L<sup>1</sup> (15.2 mg, 0.06 mmol) afforded colourless crystalline **1** suitable for X-ray analysis. M.p. 169.5 °C (decomp.). IR (KBr, cm<sup>-1</sup>): 3336, 2933, 1662, 1456, 1105, 841 (PF<sub>6</sub><sup>-</sup>), 775, 557. Anal. Calc. for C<sub>72</sub>H<sub>102</sub>Ag<sub>6</sub>F<sub>36</sub>N<sub>6</sub>P<sub>6</sub>S<sub>12</sub>: C, 29.28; H, 3.48; N, 2.85. Found: C, 28.93; H, 3.26; N, 3.19%.

[Ag<sub>3</sub>(L<sup>2</sup>)<sub>4</sub>](PF<sub>6</sub>)<sub>3</sub>·C<sub>6</sub>H<sub>5</sub>CH<sub>3</sub> (**2**). Complex **2** was obtained after adding a small amount of toluene to the top layer of dichloromethane solution of L<sup>2</sup> (15.2 mg, 0.06 mmol) then layering this with a methanol (3 mL) of AgPF<sub>6</sub> (15.9 mg, 0.06 mmol), allowing the three phase system to stand. M.p. 198.6 °C (decomp.). IR (KBr, cm<sup>-1</sup>): 3305, 1552, 1425, 1380, 1108, 837 (PF<sub>6</sub><sup>-</sup>), 713. ESI-MS: *m/z* 426.1 [Ag<sub>3</sub>(L<sup>2</sup>)<sub>4</sub>]<sup>3+</sup>.

[Hg<sub>2</sub>(L<sup>2</sup>)Br<sub>4</sub>]<sub>*n*</sub> (**3a**). To the stirring solution of L<sup>2</sup> (20.2 mg, 0.08 mmol) in dichloromethane was added to HgBr<sub>2</sub> (29.2 mg, 0.08 mmol) in methanol afforded colourless precipitate. After the filtration, the vapor diffusion of diethyl ether to DMSO solution gave rise to crystalline product, affording colourless single crystals. M.p. 185.1 °C (decomp.), IR (KBr, cm<sup>-1</sup>): 3191, 2358, 1686, 1518, 1410, 1301, 1218, 1047, 952, 712, 455. Anal. Calc. for C<sub>12</sub>H<sub>17</sub>Br<sub>4</sub>Hg<sub>2</sub>NS<sub>2</sub>: C, 15.01; H, 1.78; N, 1.46. Found: C, 15.38; H, 2.08; N, 1.83%.

[Hg<sub>2</sub>(L<sup>2</sup>)I<sub>4</sub>]<sub>*n*</sub> (**3b**). To the stirring solution of L<sup>2</sup> (20.2 mg, 0.08 mmol) in dichloromethane was added to HgI<sub>2</sub> (36.3 mg, 0.08 mmol) in methanol afforded colourless precipitate. After the filtration, the vapor diffusion of diethyl ether to DMSO solution gave rise to crystalline product, affording colourless single crystals. M.p. 203.2 °C (decomp.). IR (KBr, cm<sup>-1</sup>): 3177, 2361, 1684, 1520, 1408, 1215, 1136, 1043, 947, 708, 455. Anal. Calc. for C<sub>12</sub>H<sub>17</sub>I<sub>4</sub>Hg<sub>2</sub>NS<sub>2</sub>: C, 12.55; H, 1.49; N, 1.22; S, 5.59. Found: C, 12.93; H, 1.52; N, 1.49; S, 5.76%.

[Hg<sub>2</sub>(L<sup>3</sup>)Br<sub>4</sub>]<sub>*n*</sub> (**4**). Layering a methanol (3 mL) of HgI<sub>2</sub> (28.6 mg, 0.06 mmol) onto a dichloromethane solution (2 mL) of L<sup>3</sup> (15.2 mg, 0.06 mmol) afforded pale yellow-coloured crystalline **4** suitable for X-ray analysis. M.p. 152.6 °C (decomp.). IR (KBr, cm<sup>-1</sup>): 3259, 2912, 1503, 1437, 1408, 1093, 825, 738. Anal. Calc. for C<sub>12</sub>H<sub>17</sub>Br<sub>4</sub>Hg<sub>2</sub>NS<sub>2</sub>: C, 15.01; H, 1.78; N, 1.46. Found: C, 14.94; H, 2.03; N, 1.66%.

**Table S1** Crystal and experimental data

|                                             | <b>1</b>                                                                                                       | <b>2</b>                                                                                                     | <b>3a</b>                                                                       | <b>3b</b>                                                                      | <b>4</b>                                                                        |
|---------------------------------------------|----------------------------------------------------------------------------------------------------------------|--------------------------------------------------------------------------------------------------------------|---------------------------------------------------------------------------------|--------------------------------------------------------------------------------|---------------------------------------------------------------------------------|
| Formula                                     | C <sub>72</sub> H <sub>102</sub> Ag <sub>6</sub> F <sub>36</sub> N <sub>6</sub> P <sub>6</sub> S <sub>12</sub> | C <sub>55</sub> H <sub>76</sub> Ag <sub>3</sub> F <sub>18</sub> N <sub>4</sub> P <sub>3</sub> S <sub>8</sub> | C <sub>12</sub> H <sub>17</sub> Br <sub>4</sub> Hg <sub>2</sub> NS <sub>2</sub> | C <sub>12</sub> H <sub>17</sub> Hg <sub>2</sub> I <sub>4</sub> NS <sub>2</sub> | C <sub>12</sub> H <sub>17</sub> Br <sub>4</sub> Hg <sub>2</sub> NS <sub>2</sub> |
| Formula weight                              | 2953.36                                                                                                        | 1808.20                                                                                                      | 960.21                                                                          | 1148.17                                                                        | 960.21                                                                          |
| Temperature (K)                             | 173(2)                                                                                                         | 173(2)                                                                                                       | 173(2)                                                                          | 173(2)                                                                         | 173(2)                                                                          |
| Crystal system                              | Cubic                                                                                                          | Triclinic                                                                                                    | Orthorhombic                                                                    | Orthorhombic                                                                   | Monoclinic                                                                      |
| Space group                                 | <i>Ia-3d</i>                                                                                                   | <i>P1</i>                                                                                                    | <i>Pbca</i>                                                                     | <i>Pbca</i>                                                                    | <i>P2<sub>1</sub>/c</i>                                                         |
| Z                                           | 16                                                                                                             | 1                                                                                                            | 8                                                                               | 8                                                                              | 4                                                                               |
| <i>a</i> (Å)                                | 36.322(3)                                                                                                      | 11.4605(5)                                                                                                   | 18.2813(8)                                                                      | 18.9518(19)                                                                    | 13.5645(11)                                                                     |
| <i>b</i> (Å)                                | 36.322(3)                                                                                                      | 11.6121(6)                                                                                                   | 8.1124(4)                                                                       | 8.5212(9)                                                                      | 11.9094(10)                                                                     |
| <i>c</i> (Å)                                | 36.322(3)                                                                                                      | 13.1785(6)                                                                                                   | 26.4524(12)                                                                     | 27.755(3)                                                                      | 12.4053(10)                                                                     |
| $\alpha$ (°)                                | 90                                                                                                             | 90.294(1)                                                                                                    | 90                                                                              | 90                                                                             | 90                                                                              |
| $\beta$ (°)                                 | 90                                                                                                             | 99.549(1)                                                                                                    | 90                                                                              | 90                                                                             | 104.114(2)                                                                      |
| $\gamma$ (°)                                | 90                                                                                                             | 94.075(1)                                                                                                    | 90                                                                              | 90                                                                             | 90                                                                              |
| <i>V</i> (Å <sup>3</sup> )                  | 47921(8)                                                                                                       | 1724.87(14)                                                                                                  | 3923.0(3)                                                                       | 4482.2(8)                                                                      | 1943.5(3)                                                                       |
| <i>D<sub>x</sub></i> (g/cm <sup>3</sup> )   | 1.637                                                                                                          | 1.741                                                                                                        | 3.251                                                                           | 3.403                                                                          | 3.282                                                                           |
| $2\theta_{\max}$ (°)                        | 56.92                                                                                                          | 54                                                                                                           | 56.56                                                                           | 54                                                                             | 53                                                                              |
| <i>R</i>                                    | 0.0433                                                                                                         | 0.0535                                                                                                       | 0.0463                                                                          | 0.0427                                                                         | 0.0778                                                                          |
| <i>wR</i>                                   | 0.1194                                                                                                         | 0.1340                                                                                                       | 0.1018                                                                          | 0.1084                                                                         | 0.1129                                                                          |
| GOF                                         | 1.112                                                                                                          | 1.049                                                                                                        | 1.016                                                                           | 1.118                                                                          | 1.002                                                                           |
| No. of reflection used<br>[>2σ( <i>I</i> )] | 5010<br>[ <i>R</i> <sub>int</sub> = 0.1461]                                                                    | 8741<br>[ <i>R</i> <sub>int</sub> = 0.0118]                                                                  | 4740<br>[ <i>R</i> <sub>int</sub> = 0.1028]                                     | 4888<br>[ <i>R</i> <sub>int</sub> = 0.0589]                                    | 3943<br>[ <i>R</i> <sub>int</sub> = 0.0857]                                     |
| Diffractometer                              | Bruker SMART CC<br>D                                                                                           | Bruker SMART CC<br>D                                                                                         | Bruker SMART CC<br>D                                                            | Bruker SMART CC<br>D                                                           | Bruker SMART CC<br>D                                                            |
| Structure determination                     | SHELXTL                                                                                                        | SHELXTL                                                                                                      | SHELXTL                                                                         | SHELXTL                                                                        | SHELXTL                                                                         |
| Refinement                                  | full-matrix                                                                                                    | full-matrix                                                                                                  | full-matrix                                                                     | full-matrix                                                                    | full-matrix                                                                     |

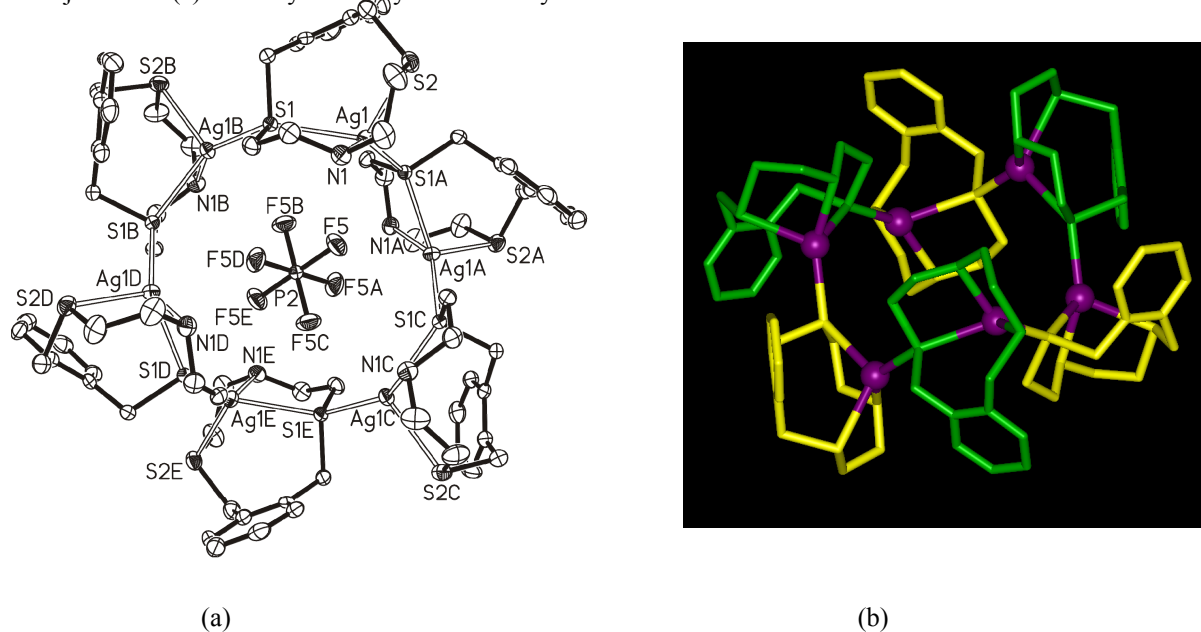

**Fig. S7** Molecular structure of **1**,  $[\text{Ag}_6(\text{L}^1)_6(\text{PF}_6)](\text{PF}_6)_5$ : (a) top view (Ortep) and (b) general view (ball-and-stick, the anion at the centre was removed). Thermal ellipsoids are drawn at the 30% probability level. Symmetry operations: (A)  $1/2 - x, 1/2 + y, z$ , (B)  $-1/2 + x, y, 1/2 - z$ , (C)  $1/2 - x, -y, 1/2 + z$ , (D)  $-1/2 + x, 1/2 - y, -z$ , (E)  $1 - x, -y, -z$

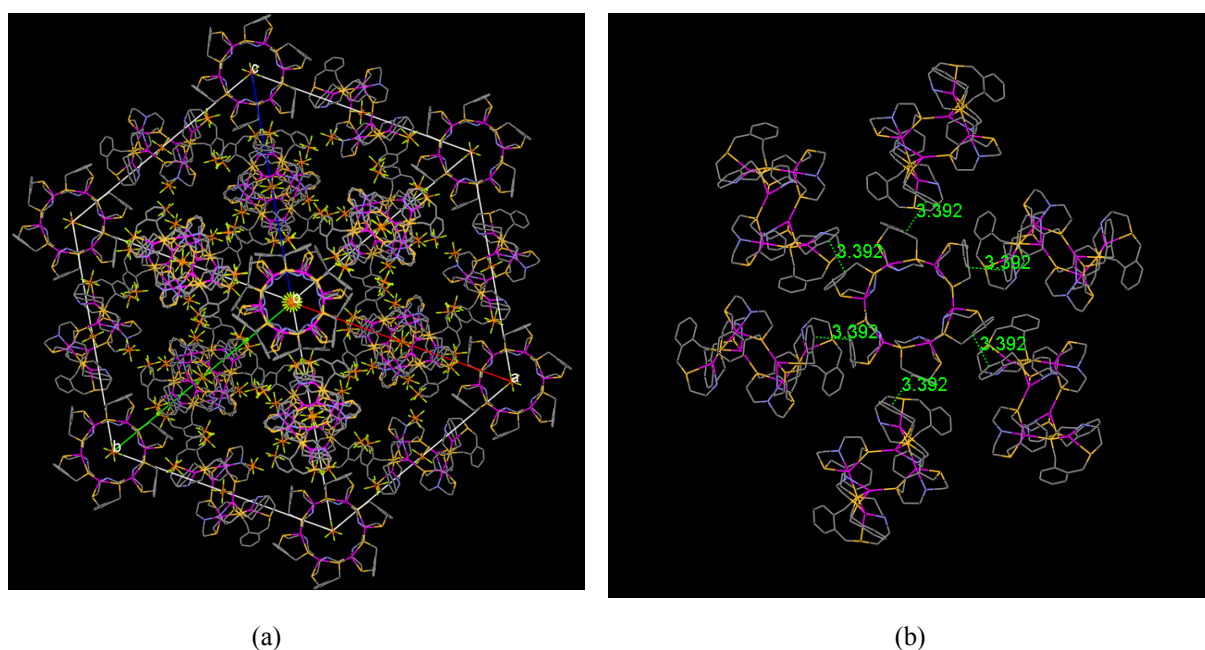

**Fig. S8** (a) Packing diagram and (b) the  $\pi$ - $\pi$  stacking interactions (dashed lines) of **1**,  $[\text{Ag}_6(\text{L}^1)_6(\text{PF}_6)](\text{PF}_6)_5$ .

**Table S2** Selected bond lengths (Å) and bond angles (°) for **1**

|             |          |           |          |
|-------------|----------|-----------|----------|
| Ag1-N1      | 2.338(3) | S1-Ag1B   | 2.452(1) |
| Ag1-S1A     | 2.452(1) | Ag1-S2    | 2.613(1) |
| Ag1-S1      | 2.614(1) |           |          |
| N1-Ag1-S1A  | 144.2(1) | N1-Ag1-S1 | 79.8(1)  |
| S1A-Ag1-S1  | 117.6(1) | N1-Ag1-S2 | 80.0(1)  |
| S1A-Ag1-S2  | 116.8(1) | S1-Ag1-S2 | 110.9(1) |
| Ag1B-S1-Ag1 | 137.0(1) |           |          |

Symmetry Code: (A)  $1/2 - x, 1/2 + y, z$ , (B)  $-1/2 + x, y, 1/2 - z$ .



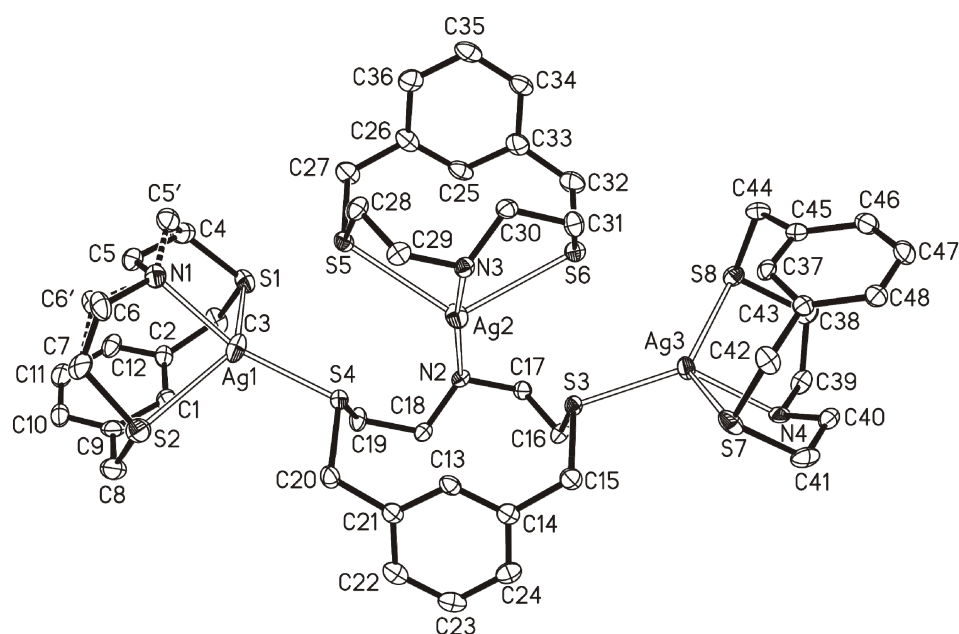

**Fig. S9** Molecular structure of **2**,  $[\text{Ag}_3(\text{L}^2)_4](\text{PF}_6)_3 \cdot \text{C}_6\text{H}_5\text{CH}_3$ . Hydrogen atoms, noncoordinating anions and solvent are omitted. Thermal ellipsoids are drawn at the 30% probability level.

**Table S3** Selected bond lengths (Å) and bond angles (°) for **2**

|           |          |           |          |
|-----------|----------|-----------|----------|
| Ag1-N1    | 2.315(8) | Ag1-S4    | 2.486(2) |
| Ag1-S1    | 2.761(2) | Ag1-S2    | 2.773(2) |
| Ag2-N2    | 2.269(6) | Ag2-N3    | 2.280(6) |
| Ag2-S5    | 2.900(2) | Ag2-S6    | 2.928(2) |
| Ag3-N4    | 2.352(7) | Ag3-S3    | 2.516(2) |
| Ag3-S8    | 2.669(2) | Ag3-S7    | 2.708(2) |
| N1-Ag1-S4 | 156.2(2) | S4-Ag1-S1 | 108.2(1) |
| N1-Ag1-S1 | 80.2(2)  | N1-Ag1-S2 | 79.8(2)  |
| S4-Ag1-S2 | 109.4(1) | S1-Ag1-S2 | 127.6(1) |
| N2-Ag2-N3 | 166.3(2) | N2-Ag2-S5 | 114.3(2) |
| N3-Ag2-S5 | 77.2(2)  | N2-Ag2-S6 | 101.0(2) |
| N3-Ag2-S6 | 78.5(2)  | S5-Ag2-S6 | 118.1(1) |
| N4-Ag3-S3 | 132.2(2) | N4-Ag3-S8 | 79.8(2)  |
| S3-Ag3-S8 | 127.8(1) | N4-Ag3-S7 | 80.0(2)  |
| S3-Ag3-S7 | 100.1(1) | S8-Ag3-S7 | 129.0(1) |

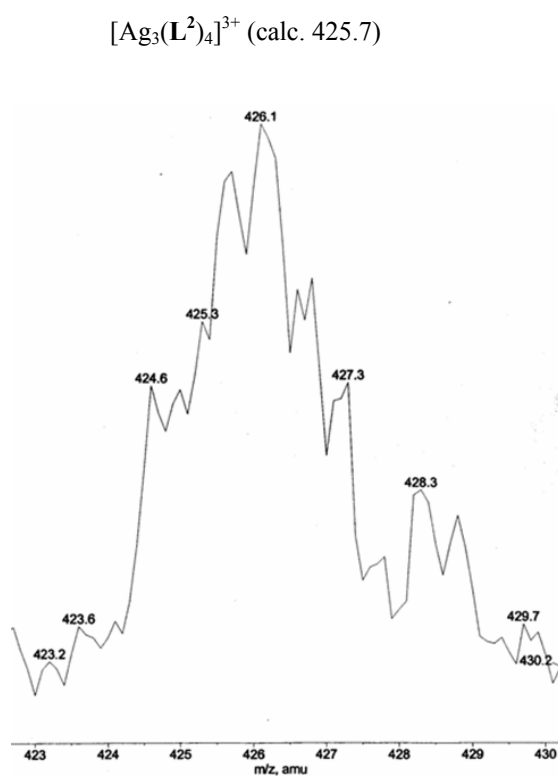

**Fig. S10** Partial ESI-mass spectrum of **2** showing the existence of  $[\text{Ag}_3(\text{L}^2)_4]^{3+}$  species.

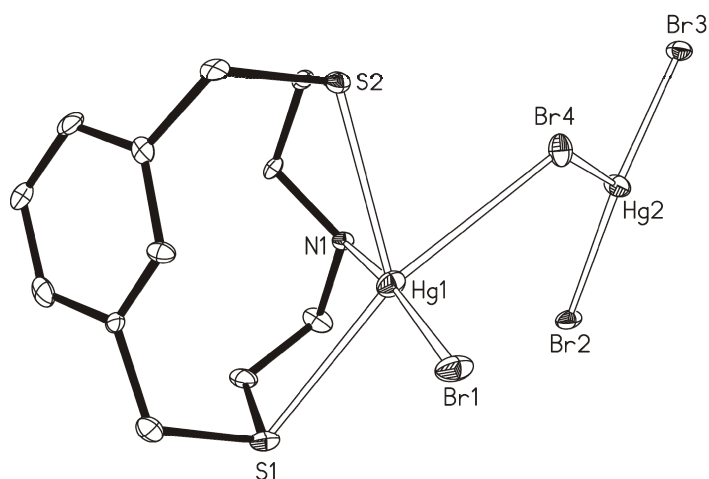

**Fig. S11** Asymmetric unit of **3a**,  $[\text{Hg}_2(\text{L}^2)\text{Br}_4]_n$ . Hydrogen atoms are omitted. Thermal ellipsoids are drawn at the 30% probability level.

**Table S4** Selected bond lengths (Å) and bond angles (°) for **3a**

|              |          |              |          |
|--------------|----------|--------------|----------|
| Hg1-N1       | 2.198(8) | Hg1-S2       | 2.864(3) |
| Hg1-Br1      | 2.439(1) | Hg1-S1       | 2.928(3) |
| Hg2-Br2      | 2.527(1) | Hg2-Br3      | 2.541(1) |
| Hg2-Br4      | 2.600(1) | Br2-Hg2B     | 2.978(1) |
| Hg2-Br2A     | 2.978(1) |              |          |
| N1-Hg1-Br1   | 170.8(2) | Br1-Hg1-S2   | 109.3(1) |
| N1-Hg1-S2    | 79.8(2)  | N1-Hg1-S1    | 78.6(2)  |
| Br1-Hg1-S1   | 94.2(1)  | S2-Hg1-S1    | 127.6(1) |
| Br2-Hg2-Br3  | 131.8(1) | Br2-Hg2-Br4  | 118.3(1) |
| Br3-Hg2-Br4  | 107.9(1) | Br2-Hg2-Br2A | 94.6(1)  |
| Br3-Hg2-Br2A | 89.6(1)  | Br4-Hg2-Br2B | 100.6(1) |
| Hg2-Br2-Hg2B | 99.6(1)  |              |          |

Symmetry Code: (A) -  $x - 1/2, y + 1/2, z$ , (B) -  $x - 1/2, y - 1/2, z$ .

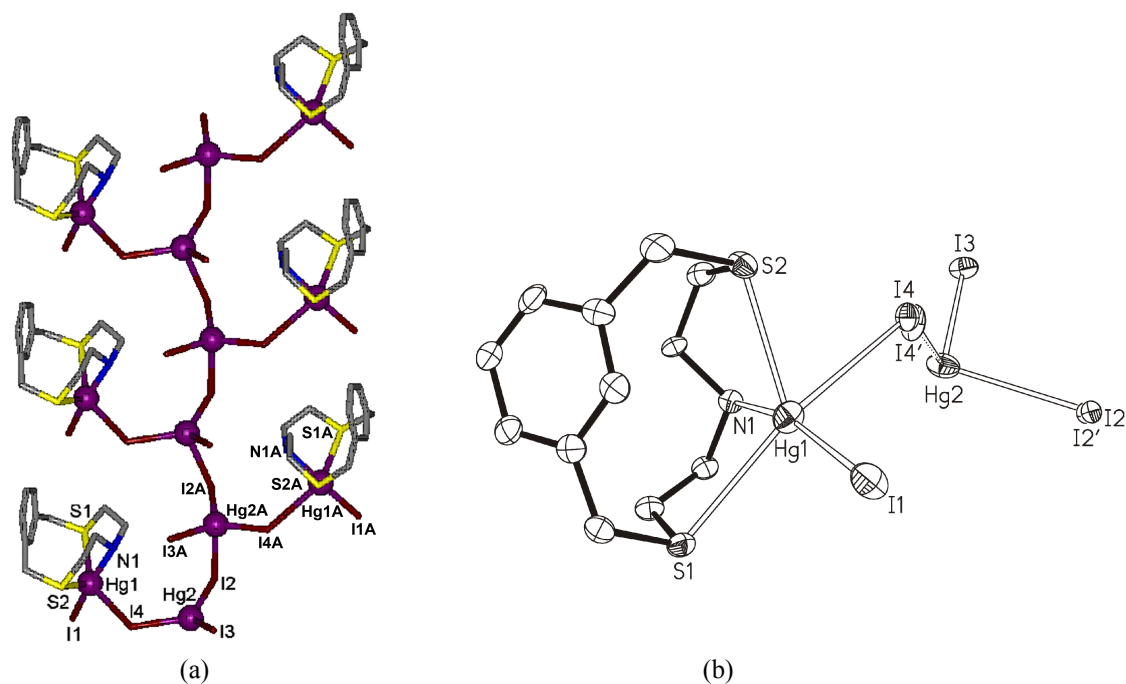

**Fig. S12** (a) Leaf-shaped infinite 1D structure and (b) asymmetric unit of **3b**,  $[\text{Hg}_2(\text{L}^2)\text{I}_4]_n$ . Thermal ellipsoids are drawn at the 30% probability level. Symmetry operations: (A)  $-x - 1/2, y + 1/2, z$

**Table S5** Selected bond lengths (Å) and bond angles (°) for **3b**

|             |            |           |            |
|-------------|------------|-----------|------------|
| Hg1-N1      | 2.224(9)   | Hg1-I1    | 2.6003(11) |
| Hg1-S2      | 2.855(3)   | Hg1-S1    | 3.012(3)   |
| Hg2-I3      | 2.7029(10) | Hg2-I2A   | 2.716(15)  |
| Hg2-I4      | 2.709(16)  | Hg2-I2    | 3.147(15)  |
| I2-Hg2B     | 2.716(15)  |           |            |
| N1-Hg1-I1   | 162.7(2)   | N1-Hg1-S2 | 79.6(2)    |
| I1-Hg1-S2   | 117.73(8)  | N1-Hg1-S1 | 76.3(2)    |
| I1-Hg1-S1   | 92.22(7)   | S2-Hg1-S1 | 123.09(9)  |
| I3-Hg2-I2A  | 120.9(3)   | I3-Hg2-I4 | 111.6(3)   |
| I2A-Hg2-I4  | 122.7(3)   | I3-Hg2-I2 | 98.9(3)    |
| I2A-Hg2-I2  | 97.6(3)    | I4-Hg2-I2 | 99.9(4)    |
| Hg2B-I2-Hg2 | 98.5(4)    |           |            |

Symmetry Code: (A)  $-x - 1/2, y + 1/2, z$ , (B)  $-x - 1/2, y - 1/2, z$ .

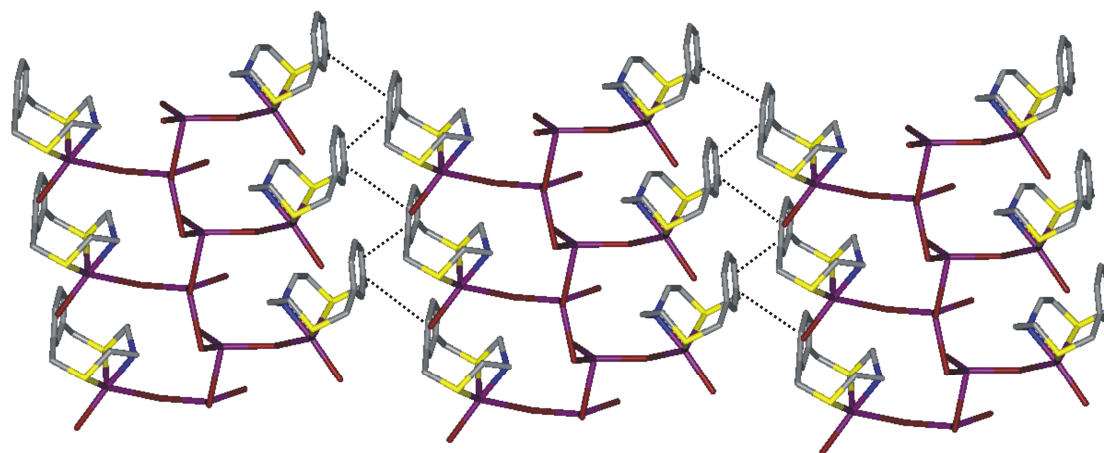

(a)

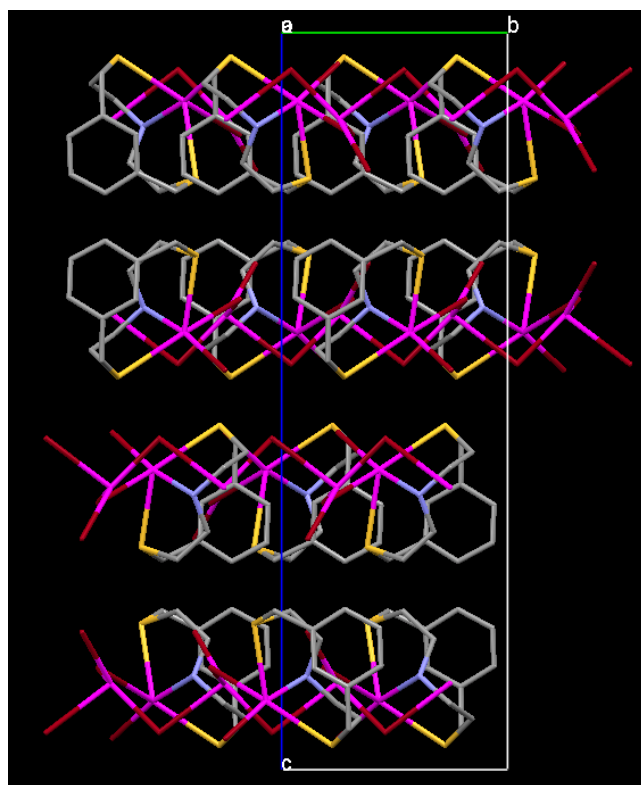

(b)

**Fig. S13** (a) Packing diagram, showing  $\pi$ - $\pi$  stacking interactions (dashed lines) and (b) projection of the 1D chain for **3**,  $[\text{Hg}_2(\text{L}^2)\text{X}_4]_n$  (**3a**: X = Br and **3b**: X = I) along the a-axis.

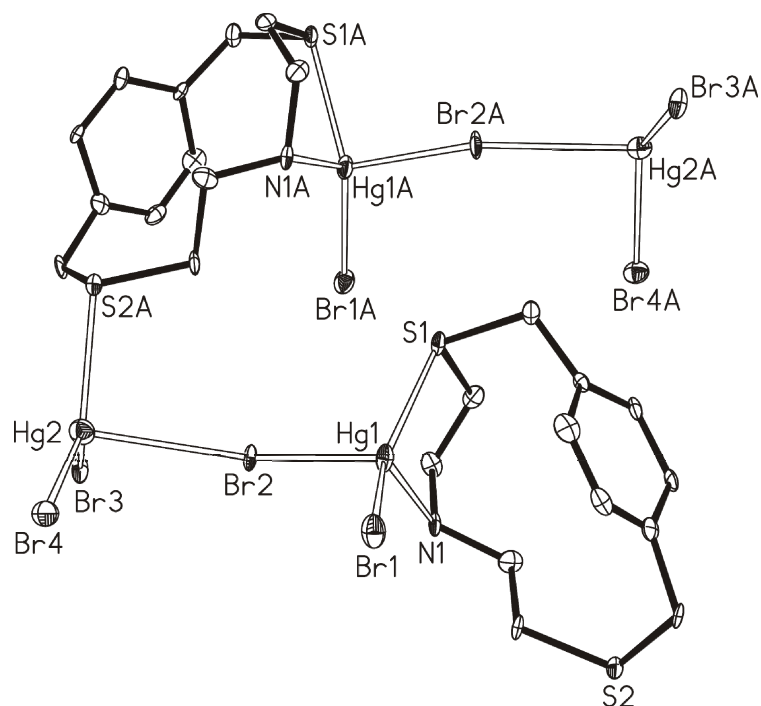

**Fig. S14** Coordination environment of **4**,  $[\text{Hg}_2(\text{L}^3)\text{Br}_4]_n$ . Thermal ellipsoids are drawn at the 30% probability level. Thermal ellipsoids are drawn at the 30% probability level. Symmetry operations: (A)  $-x + 2, y + 1/2, -z + 1/2$

**Table S6** Selected bond lengths (Å) and bond angles (°) for **4**

|             |           |             |          |
|-------------|-----------|-------------|----------|
| Hg1-N1      | 2.393(15) | Hg1-Br1     | 2.494(2) |
| Hg1-S1      | 2.524(4)  | Hg1-Br2     | 2.687(2) |
| Hg2-Br4     | 2.483(2)  | Hg2-Br3     | 2.557(2) |
| Hg2-S2A     | 2.601(4)  | Hg2-Br2     | 2.997(2) |
| S2-Hg2B     | 2.601(4)  |             |          |
|             |           |             |          |
| N1-Hg1-Br1  | 119.0(3)  | N1-Hg1-S1   | 83.8(4)  |
| Br1-Hg1-S1  | 144.4(1)  | N1-Hg1-Br2  | 88.0(3)  |
| Br1-Hg1-Br2 | 110.3(1)  | S1-Hg1-Br2  | 96.6(1)  |
| Br4-Hg2-Br3 | 127.3(1)  | Br4-Hg2-S2A | 123.2(1) |
| Br3-Hg2-S2A | 108.0(1)  | Br4-Hg2-Br2 | 94.0(1)  |
| Br3-Hg2-Br2 | 93.9(1)   | S2A-Hg2-Br2 | 94.5(1)  |
| Hg1-Br2-Hg2 | 149.0(1)  |             |          |

Symmetry Code: (A)  $-x + 2, y + 1/2, -z + 1/2$ , (B)  $-x + 2, y - 1/2, -z + 1/2$ .
